# Supplementary material
Source: PubMed Central journal article supplement (PMC4484715)
Supplement: Supp_Fig1.pdf [file Supp_Fig1.pdf]

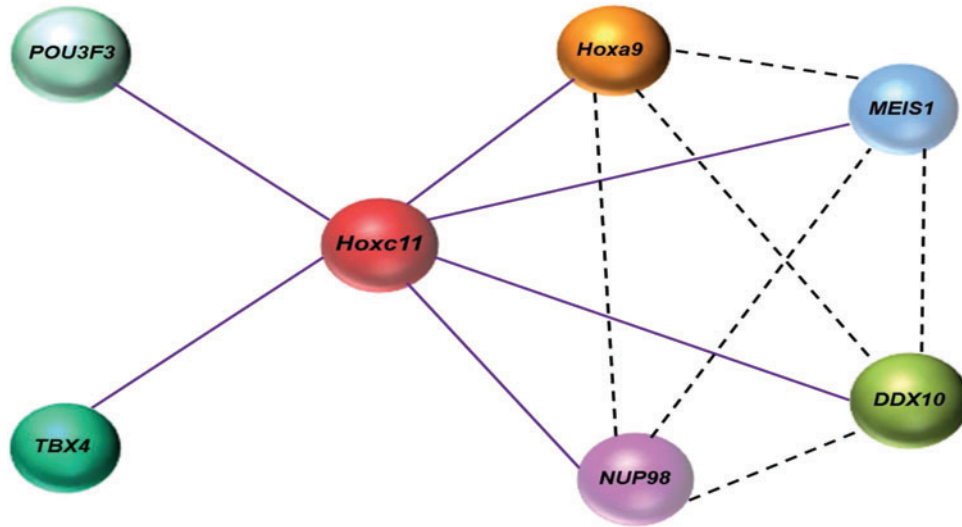

**SUPPLEMENTARY FIG. S1.** Diagrammatic illustration showing *Hoxc11* interaction with its six interacting partners. The illustration demonstrates *Hoxc11* possible position in the context of other interacting partners (*Hoxa9*, *POU3F3*, *NUP98*, *MEIS1*, *DDX10*, and *TBX4*). This pathway was deduced using the STRING software (9.05).
