# Supplementary material
Source: PubMed Central journal article supplement (PMC4484715)
Supplement: Supp_Fig2.pdf [file Supp_Fig2.pdf]

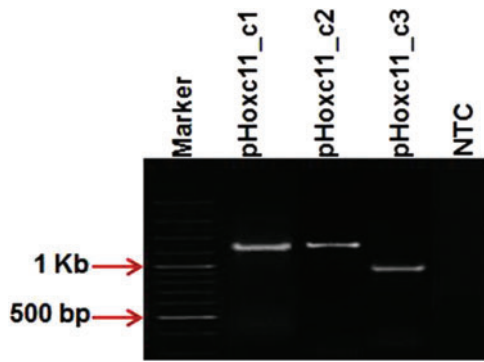

**SUPPLEMENTARY FIG. S2.** *Bubalus bubalis* Hoxc11 gene amplification. The representative gel picture shows the different amplicons, pHoxc11\_c1, pHoxc11\_c2, and pHoxc11\_c3. NTC denotes the negative control. For size marker, 100 bp ladder was used.
