# Supplementary material
Source: PubMed Central journal article supplement (PMC4484715)
Supplement: Supp_Fig3.pdf [file Supp_Fig3.pdf]

1 accaatgcgctgaacgtccccatcttacctaagagagaaccccctcctacgactggaagtgcctccgaact  
71 gatatatgacaatatctacttttggaatcagctgctcgggGAGAGAGACTAAGACGGATAACGCGTCATCTC  
141 GCCTTCCCAAATTTTACCCCTCGCTAGACCTGGTCCAAAACCTCCATCTGGAGCCGGCAGAAGAGAACG  
211 ATGTTTAACTCGGTCAACCTGGGCAACTTCTGCTCGCCGTCGGCAAGGAGAGGGGGCGCCGATTT  
M F N S V N L G N F C S P S R K E R G A D F  
277 GGCGAGCGAGGGAGCTGCGCCTCCAACCTCTATCTGCCAGTTGCACTTACTACGTGCCCGAGTT  
G E R G S C A S N L Y L P S C T Y Y V P E F  
343 TCCACGGTCTCCTCCTTCCCTGCCCCAGCCCCCTCTCGTCAGATCTCCTATCCCTACCCGGCCCAA  
S T V S S F L P Q A P S R Q I S Y P Y P A Q  
409 GTGCCCCCGGTCCGAGAGGTCTCCTACGGCCTGGAGCCCTCCGGCAAGTGGCACCCCGGAACAG  
V P P V R E V S Y G L E P S G K W H P R N S  
475 TACTCCTCCTGCTATGCGGCGGGCAGGACTCATGCACCGGGAGTGCCTGCCTCCTTCCACCGTC  
Y S S C Y A A A D E L M H R E C L P P S T V  
541 ACCGAGATCCTCATGAAAAACGAAGGCTCCTACGGCGGCCACCACCACCCAGCGCCCCGACGCC  
T E I L M K N E G S Y G G H H H P S A P H A  
607 GCCCCGCGGGCTTCTACTCCTCAGTCAACAAGAACAGTGTCTGCCCAAGCCTTTGACCGCTTC  
A P A G F Y S S V N K N S V L P Q A F D R F  
673 TTTGACAACGCCTACTGCGGCGGCAGCGACCCGCCCGGAGCCCCCTGCCCGGGCAAGGGTGAG  
F D N A Y C G G S D P P A E P P C P G K G E  
739 GCCAAAGGGGAGCCTGAGGCGCCCCGGCCTCGGGACTGGCGTCCCGGGCTGAGGCGGGGGCCGAG  
A K G E P E A P P A S G L A S R A E A G A E  
805 GCCGAGGCCGAAGAGGAGAACACGAATCCAGCTCGTCCGGTTCAGCCACTCGGCGGCCAAGGAG  
A E A E E E N T N P S S S G S A H S A A K E  
871 CCGGCCAAGGGAGCCGCCCAAGtaggtagcagcggcgggaagcagggcgggaggaggaggagg  
P A K G A A P N  
937 ctagagaggggagggcagcagggtaggggggagggcagggggagcggggacggcctcgtgttttgggtca  
1007 gtccaattttatgtggagttttataagcattcaaaggattttatataacctaacaagccctctctccca  
1077 acgactcgaactttttacgatggagaaggggtggggaggggagggaaaagggctctttggaaaagccgggtg  
1147 aacccccctctcggttatctcctctcgggtctgtgaaatttttaaaagcggccaccatcggcgggcaatataa  
1217 ctttgatcgtgaacttagaggagcatttaaggaaaggtggggagccccggcgggggttgggggtggga  
1287 gggaggggaggggtggagggggagaaaggggagggcaagggaaagacaggggagaaactccgagaggggga  
1357 gtgggtggaagagagagggcattggagcagagctggagcccggggagtcagccagggccgctctgcttctt  
1427 ttaaaaaaactattttttgaaatgttcaaacctctgtgttggcgggtccctgagcaggggctcggagcgacc  
1497 cgaggggtcagcggcgacagggggtggggggcagggcgggctcagggctcccctctgctccagggcctggggc  
1567 ttggcgtttcccctggggcccgggcctccggcggcggcctgcccaggccgggggaagggagcggcccgccg  
1637 ggcgtccccggcgccagggcccccgggaagcggctgtcgggtgtctctggtgctctctctctctctctct  
1707 ccccgcatcccagtgactctcggcggatcgcactctcttggcgcctgtctctcggcgggtccccccacattc  
1777 tgggggtggggagtggggggtgggttttagagccaccgggagggcagaggtgcgcggtgagcggggcggg  
1847 gggccttggggacgcacttggcccgggctggcgcgcatctcccgaagaccggccacagccagcggccctc  
1917 gccggaggggagggggcagggcccccgggtggccgggagcgtgggacgcgcttgcccggcaggtcggg  
1987 ggtcggcggctcggcccagcggcggcttggcggagggagaccggcggcctggtgggagggctgcccggc  
2057 ggtggggccggcagagggggcccgcgagcgtcggcgggggggctgggggtcggcaggggtctcaagctgtctct

2127 cccctctcctcgcacttgccccctcccctcccctccagACGCCCCCGCACCCGCAAGAAGCGC  
A P R T R K K R  
2192 TGCCCTTATTTGAAATTCAGATCCGGAACTGGAGCGAGAGTTTTTTTTTCAACGTGTATATCAAC  
C P Y L K F Q I R E L E R E F F F N V Y I N  
2258 AAAGAGAAGCGGTCAGCTGTTTCGGATGCTGAACCTGACGGACCGACAAGTGA AAAATTTGGTTT  
K E K R V Q L F R M L N L T D R Q V K N W F  
2324 CAGAACAGAAGGATGAAAGAAAAAATAAGCAGAGACCGGCTGCAGTATTTCTCGGGAAATCCT  
Q N R R M K E K K I S R D R L Q Y F S G N P  
2390 TTGCTGTAACCGCAGACTGGGCCCTTTTGGAGGGGAGGGGGAAAGGGGGAAATTATTTTATTTTAT  
L L \* 304  
2456 TTTTATTTTTTATTTTCTAACTCGCCTACTTTCCGCGGGTGGAAAACCTGGACTGTGGCCAGGGCTGGCCC  
2526 CCACTGCCGTTTCCCGCACGTCTTTCTGGACAACCTCCTTCACTTGGTCTGACTccatgtgggacaggg  
2596 acagggcctggaatgggggatgaaggaaagtgtctgacccacggcagtggaacccgttggcgcgagggc  
2666 caagactctttatataaaagaaaacacacctcggcagccatgtcttgctgctcgaattgggtgggggaggg  
2736 gcgagagtagtgggcgcctgaactgaacaactccttgaactaaaagccttccttgcccaagtgaacaagt  
2806 ctgctaggacaccgggtctgagggggagacttctgggctccccatcccataccccatgctccatg  
2876 gtagggggagcgtaaaatgtgaccccgcccttggctgtgaaatttctgttcccttgacctggtgttaggtgtg  
2946 caaactcgtgtcctacctcgtctacgcccagggccaccaccggcctagctgttctccccttgaaggtgt  
3016 agaaccctctttagaattttcttaactggtgctcagaggtttcctaactcttttctagcccgcccccac  
3086 ttcaatgaatattatagctatagctatgcatgtttgtaacctcttttttttggttggttgaaggaaaaaa  
3156 taaaaaagattagggtggaagggcaataggggagatgggattggggcaccctcccatagctgctggcctgaa  
3226 ttttttgaataaaatccacaagcatttctttctacccctgaggggggtgtgggtaggactggcctggaat  
3296 gagattggaatcaccatctccatgtgcgtgagtggtgtacatgtgcaatccccatccggctcgtccc  
3366 gtcccagagggattgctgtgactttttttttttttttttttttgtggcaataaagataacttcatt 3430

**SUPPLEMENTARY FIG. S3.** The nucleotide sequence of *B. bubalis* *Hoc11* gene and its *in silico* translation. Exons (black) and UTRs (purple) are shown in upper-case letters. The intron (blue) and 5' upstream and 3' downstream regions (green) are in lower-case letters. The deduced amino acid sequence of 304 residues is shown under the nucleotide sequence in a single-letter code. The triangles indicate exon-intron boundaries.
