# Supplementary material
Source: PubMed Central journal article supplement (PMC4484715)
Supplement: Supp_Fig4.pdf [file Supp_Fig4.pdf]

|            |                                                               |     |
|------------|---------------------------------------------------------------|-----|
| Buffalo    | -----GAGAGAGA-----CTAAGACGGATAACGCGTCATCTCGCCTTCCCAAATTTT     | 47  |
| Cow        | -----GAGAGAGA-----CTAAGACGGATAACGCGTCATCTCGCCTTCCCAAATTTT     | 47  |
| Whale      | GTGCTCGGGGAGAGAGA----CTAAGACGGATAACGCGTCATCTCGCCTTCCCAAATTTT  | 56  |
| Dolphin    | GTGCTCGGGGAGAGAGA----CTAAGACGGATAACGCGTCATCTCGCCTTCCCAAATTTT  | 56  |
| Sheep      | -----GAGAGAGA-----CTAAGACGGATAACGCGTCATCTCGCCTTCCCAAATTTT     |     |
| Horse      | GTGCTCCAGGAGAGAGA----CTAAGACGGATAACGCGTCATCTCGCCTTCCCAAATTTT  | 56  |
| Cat        | GTGCTCGGGGAGAGAGA----CTAAGACGGATAACGCGTCATCTCGCCTTCCCAAATTTT  | 56  |
| Walrus     | GTGCTCGGGGAGAGAGA----CTAAGACGGATAACGCGTCATCTCGCCTTCCCAAATTTT  | 56  |
| Panda      | -----GAGAGAGA-----CTAAGACGGATAACGCGTCATCTCGCCTTCCCAAATTTT     |     |
| Shrew      | --GCTCAGGGAGAGAGA----CTAAGACGGATAACGCGTCATCTCGCCTTCCCAAATTTT  | 54  |
| Dog        | -----GA-----CTAAGACGGATAACGCGTCATCTCGCCTTCCCAAATTTT           | 41  |
| Pig        | -----GAGAGAGA-----CTAAGACGGATAACGCGTCATCTCGCCTTCCCAAATTTT     |     |
| Chimpanzee | GTGCTCAGAGAGAGAGAGA--CTAAGACGGATAACGCGTCATCTCGCCTTCCCAAATTTT  | 58  |
| Human      | GTGCTCAGAGAGAGAGAGA--CTAAGACGGATAACGCGTCATCTCGCCTTCCCAAATTTT  | 58  |
| Orangutan  | GTGCTCAGAGAGAGAGAGAGACTAAGACGGATAACGCGTCATCTCGCCTTCCCAAATTTT  | 60  |
| Baboon     | GTGCTCAGGGAGAGAGA----CTAAGACGGATAACGCGTCATCTCGCCTTCCCAAATTTT  | 56  |
| Marmoset   | GTGCTCGGGGAGAGAGA----CTAAGACGGATAACGCGTCATCTCGCCTTCCCAAATTTT  | 56  |
|            |                                                               |     |
| Buffalo    | ACCCCC-TCGCTAGACCTGGTCCAAAACCTCCATCTGGAGCCGGCAG---AAGAGAACGA  | 103 |
| Cow        | ACCCCC-TCGCTAGACCTGGTCCAAAACCTCCATCTGGAGCCGGCAG---AAGAGAACGA  | 103 |
| Whale      | CCCCCC-TCGCTAGATCAGGTCCAAAACCTCCATCTGGAGCCGGCAGGAGAAGAGAACGA  | 115 |
| Dolphin    | CCCCCC-TCGCTAGATCAGGTCCAAAACCTCCATCTGGAGCCGGCAGGAGAAGAGAACGA  | 115 |
| Sheep      | -----A                                                        | 1   |
| Horse      | CCCCCC-TCGCTAGACTGGGTCCAAAACCTCCATCTGGAGCCGGCAGGAGAAGAGAACGA  | 115 |
| Cat        | CCCCCCTCGCTAGATCGGGTCCAAAACCTCCATCTGGAGCCGGCAGGAGAAGAGAACGA   | 116 |
| Walrus     | CCCCCC-TCGCTAGATCGTGTCCAAAACCTCCATCTGGAGCCGTCAGGAGAAGAGAACGA  | 115 |
| Panda      | -----A                                                        | 1   |
| Shrew      | CCCCCC-TCGCTAGAACGGGTCCAAAACCTCCATCTGGAGCCGGCAGAAGAAGAGAACGA  | 113 |
| Dog        | TCCCCCCTCGCCAGATCGGGTCCAAAACCTCCATCTGGAGCCGGCAGGAGAGGAGAACGA  | 101 |
| Pig        | -----A                                                        | 1   |
| Chimpanzee | CCCCCC-TCGCTAGACCGGTCCAAAACCTCCATCCGGAGCCGGCAGGAGAGGAGAACGA   | 117 |
| Human      | CCCCCC-TCGCTAGACCGGTCCAAAACCTCCATCCGGAGCCGGCAGGAGAGGAGAACGA   | 117 |
| Orangutan  | CCCCCC-TCGCTAGACCGGTCCAAAACCTCCATCCGGAGCCGGCAGGAGAGGAGAACGA   | 119 |
| Baboon     | CCCCCC-TCGCTAGACCGGTCCAAAACCTCCATCCGGAGCCGGCAGGAGAGGAGAACGA   | 115 |
| Marmoset   | CCCCCC-TCGCTAGACCGGTCCAAAACCTCCATCCGGAGCCGGCAGGAGAGGAGAACGA   | 115 |
|            |                                                               |     |
| Buffalo    | TGTTTAACTCGGTCAACCTGGGCAACTTCTGCTCGCCGTCGCGCAAGGAGAGGGGGCGCCG | 163 |
| Cow        | TGTTTAACTCGGTCAACCTGGGCAACTTCTGCTCGCCGTCGCGCAAGGAGAGGGGGCGCCG | 163 |
| Whale      | TGTTTAACTCGGTCAACCTGGGCAACTTCTGCTCGCCGTCGCGCAAGGAGAGGGGGCGCTG | 175 |
| Dolphin    | TGTTTAACTCGGTCAACCTGGGCAACTTCTGCTCGCCGTCGCGCAAGGAGAGGGGGCGCTG | 175 |
| Sheep      | TGTTTAACTCGGTCAACCTGGGCAACTTCTGCTCGCCGTCGCGCAAGGAGAGGGGGCGCCG | 61  |
| Horse      | TGTTTAACTCGGTCAACCTGGGCAACTTCTGCTCGCCGTCGCGCAAGGAGAGGGGGCGCTG | 175 |
| Cat        | TGTTTAACTCGGTCAACCTGGGCAACTTCTGCTCGCCGTCGCGCAAGGAGAGGGGGCGCTG | 176 |
| Walrus     | TGTTTAACTCGGTCAACCTGGGCAACTTCTGCTCGCCGTCGCGCAAGGAGAGGGGGCGCTG | 175 |
| Panda      | TGTTTAACTCGGTCAACCTGGGCAACTTCTGCTCGCCGTCGCGCAAGGAGAGGGGGCGCTG | 61  |
| Shrew      | TGTTTAACTCGGTCAACCTGGGCAACTTCTGCTCGCCGTCGCGCAAGGAGAGGGGGCGCTG | 173 |
| Dog        | TGTTTAACTCGGTCAACCTGGGCAACTTCTGCTCGCCGTCGCGCAAGGAGAGGGGGCGCTG | 161 |
| Pig        | TGTTTAACTCAGTCAACCTGGGCAACTTCTGCTCGCCGTCGCGCAAGGAGAGGGGGCGCTG | 61  |
| Chimpanzee | TGTTTAACTCGGTCAACCTGGGCAACTTCTGCTCGCCGTCGCGCAAGGAGAGGGGGCGCAG | 177 |
| Human      | TGTTTAACTCGGTCAACCTGGGCAACTTCTGCTCCTCGTCGCGCAAGGAGAGGGGGCGCAG | 177 |
| Orangutan  | TGTTTAACTCGGTCAACCTGGGCAACTTCTGCTCGCCGTCGCGCAAGGAGAGGGGGCGCAG | 179 |
| Baboon     | TGTTTAACTCGGTCAACCTGGGCAACTTCTGCTCGCCGTCGCGCAAGGAGAGGGGGCGCAG | 175 |
| Marmoset   | TGTTTAACTCGGTCAACCTGGGCAACTTCTGCTCGCCGTCGCGCAAGGAGAGGGGGCGCTG | 175 |
|            | *****                                                         | *   |

**SUPPLEMENTARY FIG. S4.** Multiple sequence alignment of *B. bubalis Hoxc11* mRNA across the species. *In silico* analysis revealed more than 94% homology of *B. bubalis Hoxc11* mRNA with that of other species. Nucleotides identical in the species are indicated by an asterisk (\*). The buffalo *Hoxc11* sequence is given in red. The positions of start and stop codons are highlighted in yellow.



**Buffalo** **ATTTGCGCGAGCGAGGGAGCTGCGCCTCCAACCTCTATCTGCCCAGTTGCACTTACTACG** 223  
**Cow** **ATTTGCGCGAGCGAGGGAGCTGCGCCTCCAACCTCTATCTGCCCAGTTGCACTTACTACG** 223  
**Whale** **ATTTGCGCGAGCGAGGGAGCTGCGCCTCCAACCTCTATCTGCCCAGTTGCACTTACTACG** 235  
**Dolphin** **ATTTGCGCGAGCGAGGGAGCTGCGCCTCCAACCTCTATCTGCCCAGTTGCACTTACTACG** 235  
**Sheep** **ATTTGCGCGAGCGAGGGAGCTGCGCCTCCAACCTCTATCTGCCCAGTTGCACTTACTACG** 121  
**Horse** **ATTTGCGCGAGCGAGGCAGCTGCGCCTCCAACCTCTATCTGCCCAGTTGCACTTACTACG** 235  
**Cat** **ATTTGCGCGAGCGAGGGAGCTGCGCCTCCAACCTCTATCTGCCCAGTTGCACTTACTACG** 236  
**Walrus** **ATTTGCGCGAGCGAGGGAGCTGCGCCTCCAACCTCTATCTGCCCAGTTGCACTTACTACG** 235  
**Panda** **ACTTCGCGAGCGAGGGAGCTGCGCCTCCAACCTCTATCTGCCCAGTTGCACTTACTACG** 121  
**Shrew** **ATTTGCGCGAGCGAGGGAGCTGCGCCTCCAACCTCTATCTGCCCAGTTGCACTTACTACG** 233  
**Dog** **ATTTGCGCGAGCGAGGGAGCTGCGCCTCCAACCTCTATCTGCCCAGTTGCACTTACTACG** 221  
**Pig** **ACTTCGCGAGCGAGGGAGCTGCGCCTCCAACCTCTATCTGCCCAGTTGCACTTACTACG** 121  
**Chimpanzee** **ATTTGCGCGAGCGAGGGAGCTGCGCCTCCAACCTCTATCTGCCCAGTTGCACTTACTACA** 237  
**Human** **ATTTGCGCGAGCGAGGGAGCTGCGCCTCCAACCTCTATCTGCCCAGTTGCACTTACTACA** 237  
**Orangutan** **ATTTGCGCGAGCGAGGGAGCTGCGCCTCCAACCTCTATCTGCCCAGTTGCACTTACTACA** 239  
**Baboon** **ATTTGCGCGAGCGAGGGAGCTGCGCCTCCAACCTCTATCTGCCCAGTTGCACTTACTACA** 235  
**Marmoset** **ATTTGCGCGAGCGAGGGAGCTGCGCCTCCAACCTCTATCTGCCCAGTTGCACTTACTACA** 235  
**\* \* \* \* \***

**Buffalo** **TGCCCCGAGTTCTCCACGGTCTCCTCCTTCCCTGCCCCAGGCCCCCTCTCGTCAGATCTCCT** 283  
**Cow** **TGCCCCGAGTTCTCCACGGTCTCCTCCTTCCCTGCCCCAGGCCCCCTCTCGTCAGATCTCCT** 283  
**Whale** **TGCCCCGAGTTCTCCACGGTCTCCTCCTTCCCTGCCCCAGGCCCCCTCTCGTCAGATCTCCT** 295  
**Dolphin** **TGCCCCGAGTTCTCCACGGTCTCCTCCTTCCCTGCCCCAGGCCCCCTCTCGTCAGATCTCCT** 295  
**Sheep** **TGCCCCGAGTTCTCCACGGTCTCCTCCTTCCCTGCCCCAGGCCCCCTCTCGTCAGATCTCCT** 181  
**Horse** **TGCCCCGAGTTCTCCACGGTCTCCTCCTTCCCTGCCCCAGGCCCCCTCTCGTCAGATCTCCT** 295  
**Cat** **TGCCCCGAGTTCTCCACGGTCTCCTCCTTCCCTGCCCCAGGCCCCCTCTCGACAGATCTCCT** 296  
**Walrus** **TGCCCCGAGTTCTCCACGGTCTCCTCCTTCCCTGCCCCAGGCCCCCTCTCGTCAGATCTCCT** 295  
**Panda** **TGCCCCGAGTTCTCCACGGTCTCCTCCTTCCCTGCCCCAGGCCCCCTCTCGTCAGATCTCCT** 181  
**Shrew** **TGCCCCGAGTTCTCCACGGTCTCCTCCTTCCCTGCCCCAGGCCCCCTCTCGGCCAGATCTCCT** 293  
**Dog** **TGCCCCGAGTTCTCCACGGTCTCCTCCTTCCCTGCCCCAGGCCCCCTCTCGCCAGCTCTCCT** 281  
**Pig** **TGCCCCGAGTTCTCCACGGTCTCCTCCTTCCCTGCCCCAGGCCCCCTCTCGTCAGATCTCCT** 181  
**Chimpanzee** **TGCCCCGAGTTCTCCACGGTCTCCTCCTTCCCTGCCCCAGGCCCCCTCTCGTCAGATCTCCT** 297  
**Human** **TGCCCCGAGTTCTCCACGGTCTCCTCCTTCCCTGCCCCAGGCCCCCTCTCGTCAGATCTCCT** 297  
**Orangutan** **TGCCCCGAGTTCTCCACGGTCTCCTCCTTCCCTGCCCCAGGCCCCCTCTCGTCAGATCTCCT** 299  
**Baboon** **TGCCCCGAGTTCTCCACGGTCTCCTCCTTCCCTGCCCCAGGCCCCCTCTCGTCAGATCTCCT** 295  
**Marmoset** **TGCCCCGAGTTCTCCACGGTCTCCTCCTTCCCTACCCCAGGCCCCCTCTCGTCAGATCTCCT** 295  
**\* \* \* \* \***

**Buffalo** **ATCCCTACCCGGCCCAAGTGCCCCGGTCCGAGAGGTCTCCTACGGCCTGGAGCCCTCCG** 343  
**Cow** **ATCCCTACCCGGCCCAAGTGCCCCGGTCCGAGAGGTCTCCTACGGCCTGGAGCCCTCCG** 343  
**Whale** **ATCCCTACCCGGCCCAAGTGCCCCGGTCCGGGAGGTCTCCTACGGCCTGGAGCCCTCCG** 355  
**Dolphin** **ATCCCTACCCGGCCCAAGTGCCCCGGTCCGGGAGGTCTCCTACGGCCTGGAGCCCTCCG** 355  
**Sheep** **ATCCCTACCCGGCCCAAGTGCCCCGGTCCGAGAGGTCTCCTACGGCCTGGAGCCCTCCG** 241  
**Horse** **ATCCCTACTCGGCCCAAGTGCCCCGGTCCGGGAGGTCTCCTACGGCCTGGAGCCATCCG** 355  
**Cat** **ACCCCTACTCAGCCCAAGTGCCCCGGTCCGGGAGGTCTCCTACGGCCTGGAGCCATCCG** 356  
**Walrus** **ATCCCTACTCAGCCCAAGTGCCCCGGTCCGGGAGGTCTCCTACGGCCTGGAGCCATCCG** 355  
**Panda** **ACCCCTACTCAGCCCAAGTGCCCCGGTCCGGGAGGTCTCCTACGGCCTGGAGCCCTCCG** 241  
**Shrew** **ACCCCTACTCGGCCCAAGTGCCCCGGTCCGGGAGGTCTCCTACGGCCTGGAGCCCTCCG** 353  
**Dog** **ACCCCTACTCGGCCCAAGTGCCCCGGTCCGGGAGGTCTCCTACGGCCTGGAGCCCTCCG** 341  
**Pig** **ATCCCTACTCAGCCCAAGTGCCCCGGTCCGGGAGGTCTCCTACGGCCTGGAACCGTCCG** 241  
**Chimpanzee** **ATCCCTACTCGGCCCAAGTGCCCCGGTCCGGGAGGTCTCCTACGGCCTGGAGCCATCCG** 357  
**Human** **ATCCCTACTCGGCCCAAGTGCCCCGGTCCGGGAGGTCTCCTACGGCCTGGAGCCATCCG** 357  
**Orangutan** **ATCCCTACTCGGCCCAAGTGCCCCGGTCCGGGAGGTCTCCTACGGCCTGGAGCCATCCG** 359  
**Baboon** **ATCCCTACTCGGCCCAAGTGCCCCGGTCCGGGAGGTCTCCTACGGCCTGGAGCCAAACCG** 355  
**Marmoset** **ATCCCTACTCGGCCCAAGTGCCCCGGTCCGGGAGGTCTCCTACGGCCTGGAGCCATCCG** 355  
**\* \* \* \* \***

SUPPLEMENTARY FIG. S4. (Continued).



|            |                                                               |     |
|------------|---------------------------------------------------------------|-----|
| Buffalo    | GCAAGTGGCACCCCGGAACAGCTACTCCTCCTGCTATGCGGCGGCCGACGAGCTCATGC   | 403 |
| Cow        | GCAAGTGGCACCCCGGAACAGCTACTCCTCCTGCTATGCGGCGGCCGACGAGCTCATGC   | 403 |
| Whale      | GCAAGTGGCACCCCGGAACAGCTACTCCTCCTGCTATGCGGCGGCCGACGAGCTCATGC   | 415 |
| Dolphin    | GCAAGTGGCACCCCGGAACAGCTACTCCTCCTGCTATGCGGCGGCCGACGAGCTCATGC   | 415 |
| Sheep      | GCAAGTGGCACCCCGGAACAGCTACTCCTCCTGCTATGCGGCGGCCGACGAGCTCATGC   | 301 |
| Horse      | GCAAGTGGCATCACCCGGAACAGCTACTCCTCCTGCTATGCGGCGGCCGACGAGCTTATGC | 415 |
| Cat        | GCAAGTGGCACCCCGGAACAGCTACTCCTCCTGCTATGCGGCGGCCGACGAGCTCATGC   | 416 |
| Walrus     | GCAAGTGGCACCCCGGAACAGCTACTCCTCCTGCTATGCGGCGGCCGACGAGCTTATGC   | 415 |
| Panda      | GCAAGTGGCACCCCGGAACAGCTACTCCTCCTGCTATGCGGCGGCCGACGAGCTCATGC   | 301 |
| Shrew      | GCAAGTGGCACCCCGGAACAGCTACTCCTCCTGCTATGCGGCGGCCGACGAGCTCATGC   | 413 |
| Dog        | GCAAGTGGCACCCCGGAACAGCTACTCCTCCTGCTATGCGGCGGCCGACGAGCTCATGC   | 401 |
| Pig        | GCAAGTGGCACCCCGGAACAGCTACTCCTCCTGCTATGCGGCGGCCGACGAGCTCATGC   | 301 |
| Chimpanzee | GCAAGTGGCACCATCGGAACAGCTACTCCTCCTGCTATGCGGCGGCCGACGAGCTTATGC  | 417 |
| Human      | GCAAGTGGCACCATCGGAACAGCTACTCCTCCTGCTATGCGGCGGCCGACGAGCTTATGC  | 417 |
| Orangutan  | GCAAGTGGCACCATCGGAACAGCTACTCCTCCTGCTATGCGGCGGCCGACGAGCTTATGC  | 419 |
| Baboon     | GCAAGTGGCACCATCGGAACAGCTACTCCTCCTGCTATGCTGCTGCCGACGAGCTTATGC  | 415 |
| Marmoset   | GCAAGTGGCACCATCGGAACAGCTACTCCTCCTGCTATGCGGCGGCCGACGAGCTCATGC  | 415 |
|            | ***** * ***** ** ***** ** ***** **                            |     |
| Buffalo    | ACCGGGAGTGCCTGCCTCCTTCCACCGTCACCGAGATCCTCATGAAAAACGAAGGCTCCT  | 463 |
| Cow        | ACCGGGAGTGCCTGCCTCCTTCCACCGTCACCGAGATCCTCATGAAAAACGAAGGCTCCT  | 463 |
| Whale      | ACCGGGAGTGCCTGCCTCCTTCCACCGTCACCGAGATCCTCATGAAAAACGAAGGCTCCT  | 475 |
| Dolphin    | ACCGGGAGTGCCTGCCTCCTTCCACCGTCACCGAGATCCTCATGAAAAACGAAGGCTCCT  | 475 |
| Sheep      | ACCGGGAGTGCCTGCCTCCTTCCACCGTCACCGAGATCCTCATGAAAAACGAAGGCTCCT  | 361 |
| Horse      | ACCGGGAGTGCCTGCCTCCTTCCACCGTCACCGAGATCCTCATGAAAAACGAAGGCTCCT  | 475 |
| Cat        | ACCGGGAGTGCCTGCCTCCTTCCACCGTCACCGAGATCCTCATGAAAAACGAAGGCTCCT  | 476 |
| Walrus     | ACCGGGAGTGCCTGCCTCCTTCCACCGTCACCGAGATCCTCATGAAAAACGAAGGCTCCT  | 475 |
| Panda      | ACCGGGAGTGCCTGCCTCCTTCCACCGTCACCGAGATCCTCATGAAAAACGAAGGCTCCT  | 361 |
| Shrew      | ACCGCGAGTGCCTGCCGCGTCCACCGTCACCGAGATCCTCATGAAAAACGAAGGCTCCT   | 473 |
| Dog        | ACCGGGAGTGCCTGCCTCCTTCCACCGTCACCGAGATCCTCATGAAAAACGAAGGCTCCT  | 461 |
| Pig        | ACCGGGAGTGCCTGCCTCCTTCCACCGTCACCGAGATCCTCATGAAAAACGAAGGCTCCT  | 361 |
| Chimpanzee | ACCGGGAGTGCCTGCCTCCTTCCACCGTCACCGAGATCCTCATGAAAAACGAAGGCTCCT  | 477 |
| Human      | ACCGGGAGTGCCTGCCTCCTTCCACCGTCACCGAGATCCTCATGAAAAACGAAGGCTCCT  | 477 |
| Orangutan  | ACCGGGAGTGCCTGCCTCCTTCCACCGTCACCGAGATCCTCATGAAAAACGAAGGCTCCT  | 479 |
| Baboon     | ACCGGGAGTGCCTGCCTCCTTCCACCGTCACCGAGATCCTCATGAAAAACGAAGGCTCCT  | 475 |
| Marmoset   | ACCGGGAGTGCCTGCCTCCTTCCACTGTCACCGAGATCCTCATGAAAAACGAAGGCTCCT  | 475 |
|            | **** ***** ** * ***** ***** *****                             |     |
| Buffalo    | ACGGCGGCCACCACCACCCAGCGCCCCGACGCGCCCCGCGGCTTCTACTCCTCAG       | 523 |
| Cow        | ACGGCGGCCACCACCACCCAGCGCCCCGACGCGCCCCGCGGCTTCTACTCCTCAG       | 523 |
| Whale      | ACGGCGGCCACCACCACCCAGCGCCCCGACGCGCCCCGCGGCTTCTACTCCTCAG       | 535 |
| Dolphin    | ACGGCGGCCACCACCACCCAGCGCCCCGACGCGCCCCGCGGCTTCTACTCCTCAG       | 535 |
| Sheep      | ACGGCGGCCACCACCACCCAGCGCCCCGACGCGCCCCGCGGCTTCTACTCCTCAG       | 421 |
| Horse      | ACGGCGGCCACCACCACCCAGCGCCCCGACGCGCCCCGCGGCTTCTACTCCTCAG       | 535 |
| Cat        | ACGGCGGCCACCACCACCCAGCGCCCCGACGCGCCCCGCGGCTTCTACTCCTCAG       | 536 |
| Walrus     | ACGGCGGCCACCACCACCCAGCGCCCCGACGCGCCCCGCGGCTTCTACTCCTCAG       | 535 |
| Panda      | ACGGCGGCCACCACCACCCAGCGCCCCGACGCGCCCCGCGGCTTCTACTCCTCAG       | 421 |
| Shrew      | ACGGCGGCCACCACCACCCAGCGCCCCGACGCGCCCCGCGGCTTCTATTCTCAG        | 533 |
| Dog        | ACGGCGGCCACCACCACCCAGCGCCCCGACGCGCCCCGCGGCTTCTACTCCTCAG       | 521 |
| Pig        | ACGGCGGCCACCACCACCCAGCGCCCCGACGCGCCCCGCGGCTTCTACTCCTCAG       | 421 |
| Chimpanzee | ACGGCGGCCACCACCACCCAGCGCCCCGACGCGCCCCGCGGCTTCTACTCCTCAG       | 537 |
| Human      | ACGGCGGCCACCACCACCCAGCGCCCCGACGCGCCCCGCGGCTTCTACTCCTCAG       | 537 |
| Orangutan  | ACGGCGGCCACCACCATCCAGCGCCCCGACGCGCCCCGCGGCTTCTACTCCTCAG       | 539 |
| Baboon     | ACGGCAGCCACCACCACCCAGCGCCCCGACGCGCCCCGCGGCTTCTACTCCTCAG       | 535 |
| Marmoset   | ACGGCGGCCACCACCACCCAGTGCCTCAGCGCGCCCCGCGGCTTCTACTCCTCAG       | 535 |
|            | ***** ***** ***** ***** * * ***** *****                       |     |

SUPPLEMENTARY FIG. S4. (Continued).



**Buffalo** TCAACAAGAACAGTGTCTGCCCCAAGCCTTTGACCGCTTCTTTGACAACGCCTACTGCG 583  
 Cow TCAACAAGAACAGTGTCTGCCCCAAGCCTTTGACCGCTTCTTCGACAACGCCTACTGCG 583  
 Whale TCAACAAGAACAGCGTCTGCCCCAAGCCTTCGACCGTTCTTCGACAACGCCTACTGCG 595  
 Dolphin TCAACAAGAACAGCGTCTGCCCCAAGCCTTCGACCGTTCTTCGACAACGCCTACTGCG 595  
 Sheep TCAACAAGAACAGCGTCTGCCCCAAGCCTTTGACCGCTTCTTCGACAACGCCTACTGCG 481  
 Horse TCAACAAGAACAGCGTCTGCCCCAAGCCTTCGACCGTTCTTCGACAACGCCTACTGCG 595  
 Cat TCAACAAGAACAGCGTCTGCCCCAAGCCTTCGACCGTTCTTCGACAACGCCTACTGCG 596  
 Walrus TCAACAAGAACAGCGTCTGCCCCAAGCCTTCGACCGTTCTTCGACAACGCCTACTGCG 595  
 Panda TCAACAAGAACAGCGTCTGCCCCAAGCCTTCGACCGTTCTTCGACAACGCCTACTGCG 481  
 Shrew TCAACAAGAACAGCGTCTGCCCCAAGCCTTCGACCGTTCTTCGACAACGCCTACTGCG 593  
 Dog TCAGCAAGAACAGCGTCTGCCCCAAGCCTTCGACCGTTCTTCGACAACGCCTACTGCG 581  
 Pig TCAGCAAGAACAGCGTCTGCCCCAAGCCTTCGACCGTTCTTCGACAACGCCTACTGCG 481  
 Chimpanzee TCAACAAGAACAGCGTCTGCCCCAAGCCTTCGACCGTTCTTCGACAACGCCTACTGCG 597  
 Human TCAACAAGAACAGCGTCTGCCCCAAGCCTTCGACCGTTCTTCGACAACGCCTACTGCG 597  
 Orangutan TCAACAAGAACAGCGTCTGCCCCAAGCCTTCGACCGTTCTTCGACAACGCCTACTGCG 599  
 Baboon TCAACAAGAACAGCGTCTGCCCCAAGCCTTCGACCGTTCTTCGACAACGCCTACTGCG 595  
 Marmoset TCAACAAGAACAGCGTCTGCCCCAAGCCTTCGACCGTTCTTCGACAACGCCTACTGCG 595  
 \*\*\* \*\*\*\*\* \* \* \*\*\*\*\* \*\*\*\*\* \*\*\*\*\* \*\*\*\*\* \*\*\*\*\* \*\*\*\*\*

**Buffalo** GCGGCAGCG-----ACCCGCCCGCCGAGCCCCCTGCCCGGGCAAGGGTGAGGCCAAG 637  
 Cow GCGGCAGCG-----ACCCGCCCGCCGAGCCCCCTGCCCGGGCAAGGGTGAGGCCAAG 637  
 Whale GTGGCGGCG-----ACGCGCCCGCCGAGCCCCCTGCCCGGGCAAGGGTGAGGCCAAG 649  
 Dolphin GTGGTGCG-----ACGCGCCCGCCGAGCCCCCTGCCCGGGCAAGGGTGAGGCCAAG 649  
 Sheep GCGGCAGCG-----GGCCGCCCGCCGAGCCCCCATGCCGGC----- 519  
 Horse GCGGCAGCG-----ACGCGCCCGCCGAGCCCCCTGCCCGGGCAAGGGTGAGGCCAAG 655  
 Cat GCGGCAGCG-----ACGCGCCCGCCGAGCCCCCTGCCCGGGCAAGGGTGAGGCCAAG 650  
 Walrus GCGGCAGCG-----ACGCGCCCGCCGAGCCCCCTGCCCGGGCAAGGGTGAGGCCAAG 649  
 Panda GTGGCGGCG-----ACGCGCCCGCCGAGCCCCCTGCCCGGGCAAGGGTGAGGCCAAG 535  
 Shrew GCGGCAGCG-----ACGCGCCCGCCGAGCCCCCTGCCCGGGCAAGGGTGAGGCCAAG 647  
 Dog GCGGCAGCG-----ACGCGCCCGCCGAGCCCCCTGCCCGGGCAAGGGTGAGGCCAAG 635  
 Pig GCGGCAGCG-----ACGCGCCCGCCGAGCCCCCTGCCCGGGCAAGGGTGAGGCCAAG 535  
 Chimpanzee GTGGCGGCG-----ACGCGCCCGCCGAGCCCCCTGCCCGGGCAAGGGTGAGGCCAAG 651  
 Human GTGGCGGCG-----ACCGCCCGCCGAGCCCCCTGCCCGGGCAAGGGTGAGGCCAAG 651  
 Orangutan GTGGCGGCG-----ACGCGCCCGCCGAGCCCCCTGCCCGGGCAAGGGTGAGGCCAAG 653  
 Baboon GTGGCGGCG-----ACGCTCCAGCCGAGCCCCCTGCCCGGGCAAGGGTGAGGCCAAG 649  
 Marmoset GTGGCGGCG-----ACGCGCCCGCCGAGCCCCCTGCCCGGGCAAGGGTGAGGCCAAG 649  
 \* \* \* \* \* \* \* \* \* \* \* \* \* \* \* \* \* \* \* \* \* \* \* \* \* \* \* \* \* \* \* \* \* \* \* \* \* \* \* \*

**Buffalo** GGGAGCCTGAGGCGCCCCCGGCTCGGGACTGGCGTCCCGGGCTGAGGCGGGGGCCGAGG 697  
 Cow GGGAGCCTGAGGCGCCCCAGCCTCGGGACTGGCGTCCCGGGCTGAGGCGGGGGCCGAGG 697  
 Whale GGGAGCCGAGGCGCCCCCGGCTCGGGACTGGCGTCCCGGGCTGAGGCGGGGGCCGAGG 709  
 Dolphin GGGAGCCGAGGCGCCCCCGGCTCGGGACTGGCGTCCCGGGCTGAGGCGGGGGCCGAGG 709  
 Sheep ----GCC----CGCCCGCCGCCCG--CCGGCTTCT----- 547  
 Horse GGGAGCCGAGGCGCCCCCGGCTCGGGACTGGCGTCCCGGGCTGAGGCGGGGGCCGAGG 715  
 Cat GGGAGCCTGAGGCGCCCCCGGCTCGGGACTGGCGTCCCGGGCTGAGGCGGGGGCCGAGG 710  
 Walrus GGGAGCCTGAGGCGACCCCGGCTCGGGACTGGCGTCCCGGGCTGCGGCGGGGGCCGAGG 709  
 Panda GGGAGCCTGAGGCGACCCAGCCGCGGGACTGGCGTCCCGGGCTGAGGCGGGGGCCGAGG 595  
 Shrew GGGAGCCGAGGCGCCCCCGGCTCGGGACTGGCGTCCCGGGCTGAGGCGGGGGCCGAGG 707  
 Dog GGGAGCCGAGGCGACCCCGGCTCGGGACTGGCGTCCCGGGCTGAGGCGGGGGCCGAGG 695  
 Pig GGGAGCCGAGGCGCCCCCGGCTCGGGACTGGCGTCCCGGGCTGAGGCGGGGGCCGAGG 595  
 Chimpanzee GGGAGCCGAGGCGACCCCGGCTCGGGACTGGCGTCCCGGGCTGAGGCGGGTGCCGAGG 711  
 Human GGGAGCCGAGGCGACCCCGGCTCGGGACTGGCGTCCCGGGCTGAGGCGGGTGCCGAGG 711  
 Orangutan GGGAGCCGAGGCGCCCCCGGCTCGGGACTGGCGTCCCGGGCTGAGGCGGGTGCCGAGG 713  
 Baboon GGGAGCCGAGGCGCCCCCGGCTCGGGACTGGGGTCCCGGGCTGAGGCGGGTACCAGG 709  
 Marmoset GGGAGCCGAGGCGCCCCCGGCTCGGGACTAGCGTCCCGGGCTGAGGCGGGTGCCGAGG 709  
 \*\*\* \* \* \* \* \* \* \* \* \* \* \* \* \* \* \* \* \* \* \* \* \* \* \* \* \* \* \* \* \* \* \* \* \* \* \* \* \* \* \* \*

SUPPLEMENTARY FIG. S4. (Continued).



**Buffalo** C---CGAGGCCGAGAGGAGAAACACGAATCCCAGCTCGTCCGGTTCAGCCCACTC---GG 751  
**Cow** C---CGAGGCCGAGAGGAGAAACACGAATCCCAGCTCGTCCGGTTCAGCCCACTC---GG 751  
**Whale** CGGCCGAGGCCGAGGAGGAAAACACGAATCCCAGCTCGTCCGGTTCAGCCCACTC---GG 766  
**Dolphin** CGGCCGAGGCCGAGGAGGAAAACACGAATCCCAGCTCGTCCGGTTCAGCCCACTC---GG 766  
**Sheep** -----ACTCC-----TCAGTCAAC-----GG 563  
**Horse** C---CGAGGCCGAGGAGGAAAACACGAATCCCAGCTCGTCTGGTTCAGCCCACTC---GG 769  
**Cat** C---CGAGGCCGAGGAGGAAAACACGAATCCCAGCTCGTCCGGTTCAGCCCACTC---GG 764  
**Walrus** C---CGAGGCCGAGGAGGAAAACACGAATCCCAGCTCGTCCGGTTCAGCCCACTC---GG 763  
**Panda** C---CGAGGCCGAGGAGGAAAACACGAATCCCAGCTCGTCCGGTTCAGCCCACTC---CG 649  
**Shrew** C---CGAGGCCGAGGAGGAGAACACGAACCCAGCTCGTCCGGTTCAGCCCACTC---GG 761  
**Dog** C---CGAGGCCGAGGAGGAGACACGAACCCAGCTCGTCCGGTTCAGCCCACTCGGCCG 752  
**Pig** C---CGAGGCCGAGGAGGAGAACACGAACCCAGCTCGTCCGGTTCAGCCCACTC---GG 649  
**Chimpanzee** CG---GAGGCTGAGGAGGAGAACACAAATCCCAGCTCGTCCGGTTCAGCCCACTC---CG 765  
**Human** CG---GAGGCTGAGGAGGAGAACACAAATCCCAGCTCGTCCGGTTCAGCCCACTC---CG 765  
**Orangutan** CG---GAGGCTGAGGAGGAGAACACAAATCCCAGCTCGTCCGGTTCAGCCCACTC---CG 767  
**Baboon** CG---GAGGCTGAGGAGGAGAACACAAATCCCAGCTCGTCCGGTTCAGCCCACTC---CG 763  
**Marmoset** CG---GAGGCTGAGGAGGAGAACACAAATCCCAGCTCGTCCGGTTCATCCCACTC---TG 763

\*   \*   \*   \*   \*   \*

**Buffalo** CGGCCAAGGAGCCGGCCAAGGGAGCCGCCCAACGCCCCCGCACCCGCAAGAAGCGCT 811  
**Cow** CGGCCAAGGAGCCGGCCAAGGGAGCCGCCCAACGCCCCCGCACCCGCAAGAAGCGCT 811  
**Whale** CGGCCAAGGAGCCGGCCAAGGGAGCCGCCCAACGCCCCCGCACCCGCAAGAAGCGCT 826  
**Dolphin** CGGCCAAGGAGCCGGCCAAGGGAGCCGCCCAACGCCCCCGCACCCGCAAGAAGCGCT 826  
**Sheep** GGAGCCGGGA--CGGCCTCG----TGTTTGGACGCCCCCGCACCCGCAAGAAGCGCT 616  
**Horse** CGGCCAAGGAGCCGGCCAAGGGAGCCGCCCAACGCCCCCGCACCCGCAAGAAGCGCT 829  
**Cat** CGGCCAAGGAGCCGGCCAAGGGAGCCGCCCAACGCCCCCGCACCCGCAAGAAGCGCT 824  
**Walrus** CGGCCAAGGAGCCGGCCAAGGGAGCCGCCCAACGCCCCCGCACCCGCAAGAAGCGCT 823  
**Panda** CGGCCAAGGAGCCGGCCAAGGGAGCCGCCCAACGCCCCCGCACCCGCAAGAAGCGCT 709  
**Shrew** CGGCTAAGGAGCCGGCCAAGGGAGCCGCCCAACGCCCCCGCACCCGCAAGAAGCGCT 821  
**Dog** CGGCCAAGGAGCCGGCCAAGGGAGCCGCCCAACGCCCCCGCACCCGCAAGAAGCGCT 812  
**Pig** CGACCAAGGAGCCGGCCAAGGGAGCCGCCCAACGCCCCCGCACCCGCAAGAAGCGCT 709  
**Chimpanzee** TGGCCAAGGAGCCGGCCAAGGGAGCCGCCCAACGCCCCCGCACCCGCAAGAAGCGCT 825  
**Human** TGGCCAAGGAGCCGGCCAAGGGAGCCGCCCAACGCCCCCGCACCCGCAAGAAGCGCT 825  
**Orangutan** TGGCCAAGGAGCCGGCCAAGGGAGCCGCCCAAGCGCCCGCACCCGCAAGAAGCGCT 827  
**Baboon** CGGCCAAGGAGCCGGCCAAGGGAGCCGCCCAACGCCCCCGCACCCGCAAGAAGCGCT 823  
**Marmoset** CGGCCAAGGAGCCGACCAAGGGAGCCGCCCAACGCTCCCGCACCCGCAAGAAGCGCT 823

\*   \*   \*   \*   \*   \*   \*   \*   \*   \*   \*   \*   \*   \*   \*   \*   \*   \*   \*   \*   \*   \*

**Buffalo** GCCCTTATTTGAAATTCAGATCCGGGAAGCTGGAGCGAGAGTTTTTTTCAACGTGTATA 871  
**Cow** GCCCTTATTCGAAATTCAGATCCGGGAAGCTGGAGCGAGAGTTTTTCTTCAACGTGTATA 871  
**Whale** GCCCTTATTCGAAATTCAGATCCGGGAAGCTGGAGCGAGAGTTTTTCTTCAACGTGTATA 886  
**Dolphin** GCCCTTATTCGAAATTCAGATCCGGGAAGCTGGAGCGAGAGTTTTTCTTCAACGTGTATA 886  
**Sheep** GCCCTTATTCGAAATTCAGATCCGGGAAGCTGGAGCGAGAGTTTTTCTTCAACGTGTATA 676  
**Horse** GCCCTTATTCGAAATTCAGATCCGGGAAGCTGGAGCGAGAGTTTTTCTTCAACGTGTATA 889  
**Cat** GCCCTTATTCGAAATTCAGATCCGGGAAGCTGGAGCGAGAGTTTTTCTTCAACGTGTATA 884  
**Walrus** GCCCTTATTCGAAATTCAGATCCGGGAAGCTGGAGAGAGAGTTTTTCTTCAACGTGTATA 883  
**Panda** GCCCTTATTCGAAATTCAGATCCGGGAGCTGGAGCGGAGTTTTTCTTCAACGTGTATA 769  
**Shrew** GTCCTTATTCGAAATTCAGATCCGGGAAGCTGGAGCGAGTTTTTCTTCAACGTGTATA 881  
**Dog** GCCCTTATTCGAAATTCAGATCCGGGAAGCTGGAGCGAGAGTTTTTCTTCAACGTGTATA 872  
**Pig** GCCCTTATTCGAAATTCAGATCCGGGAAGCTGGAGCGGAGTTTTTCTTCAACGTGTATA 769  
**Chimpanzee** GCCCTTATTCGAAATTCAGATCCGGGAAGCTGGAGCGAGAGTTTTTCTTCAACGTGTATA 885  
**Human** GCCCTTATTCGAAATTCAGATCCGGGAAGCTGGAGCGAGAGTTTTTCTTCAACGTGTATA 885  
**Orangutan** GCCCTTATTCGAAATTCAGATCCGGGAAGCTGGAGCGAGAGTTTTTCTTCAACGTATATA 887  
**Baboon** GCCCTTATTCGAAATTCAGATCCGGGAAGCTGGAGCGAGAGTTTTTCTTCAACGTATATA 883  
**Marmoset** GCCCTTATTCGAAATTCAGATCCGGGAAGCTGGAGCGAGAGTTTTTCTTCAACGTGTATA 883

\*   \*   \*   \*   \*   \*   \*   \*   \*   \*   \*   \*   \*   \*   \*   \*   \*   \*   \*   \*   \*   \*

SUPPLEMENTARY FIG. S4. (Continued).



|            |                                                              |      |
|------------|--------------------------------------------------------------|------|
| Buffalo    | TCAACAAAGAGAAGCGGGTGCAGCTGTTTCGGATGCTGAACCTGACGGACCGACAAGTGA | 931  |
| Cow        | TCAACAAAGAGAAGCGGGTGCAGCTGCTCGGATGCTGAACCTGACGGACCGACAAGTGA  | 931  |
| Whale      | TCAACAAAGAAAAGCGGGTGCAGCTGCTCGGATGCTGAACCTGACGGACCGACAAGTGA  | 946  |
| Dolphin    | TCAACAAAGAAAAGCGGGTGCAGCTGCTCGGATGCTGAACCTGACGGACCGACAAGTGA  | 946  |
| Sheep      | TCAACAAAGAGAAGCGGGTGCAGCTGCTCGGATGCTGAACCTGACGGACCGACAAGTGA  | 736  |
| Horse      | TCAACAAAGAGAAGCGGGTGCAGCTGCTCGGATGCTGAACCTGACGGACCGACAAGTGA  | 949  |
| Cat        | TCAACAAAGAGAAGCGGGTGCAGCTGCTCGGATGCTGAACCTGACGGACCGACAAGTGA  | 944  |
| Walrus     | TCAACAAAGAGAAGCGGGTGCAGCTGCTCGGATGCTGAACCTGACGGACCGACAAGTGA  | 943  |
| Panda      | TCAACAAAGAGAAGCGGGTGCAGCTGCTCGGATGCTGAACCTGACGGACCGACAAGTGA  | 829  |
| Shrew      | TCAACAAAGAGAAGCGGGTGCAGCTGCTCGGATGCTGAACCTGACGGACCGACAAGTGA  | 941  |
| Dog        | TCAACAAAGAGAAGCGGGTGCAGCTGCTCGGATGCTGAACCTGACGGACCGACAAGTGA  | 932  |
| Pig        | TCAACAAAGAGAAGCGTCTGCAGCTGCTCCGCATGCTGAACCTGACGGACCGACAAGTGA | 829  |
| Chimpanzee | TCAACAAAGAGAAGCGGGTGCAGCTGCTCGGATGCTGAACCTGACGGACCGACAAGTGA  | 945  |
| Human      | TCAACAAAGAGAAGCGGGTGCAGCTGCTCGGATGCTGAACCTGACGGACCGACAAGTGA  | 945  |
| Orangutan  | TCAACAAAGAGAAGCGGGTGCAGCTGCTCGGATGCTGAACCTGACGGACCGACAAGTGA  | 947  |
| Baboon     | TCAACAAAGAGAAGCGGGTGCAGCTGCTCGGATGCTGAACCTGACGGACCGACAAGTGA  | 943  |
| Marmoset   | TCAACAAAGAGAAGCGGGTGCAGCTGCTCGGATGCTGAACCTGACGGACCGACAAGTGA  | 943  |
|            | ***** ** * ***** ** *****                                    |      |
| Buffalo    | AAATTTGGTTTCAGAACAGAAGGATGAAAGAAAAAAATAAGCAGAGACCGGCTGCAGT   | 991  |
| Cow        | AAATTTGGTTTCAGAACAGAAGGATGAAAGAAAAAACTAAGCAGAGACCGGCTGCAGT   | 991  |
| Whale      | AAATTTGGTTTCAGAACAGAAGGATGAAAGAAAAAACTAAGCAGAGACCGGCTGCAGT   | 1006 |
| Dolphin    | AAATTTGGTTTCAGAACAGAAGGATGAAAGAAAAAACTAAGCAGAGACCGGCTGCAGT   | 1006 |
| Sheep      | AAATTTGGTTTCAGAACAGAAGGATGAAAGAAAAAACTAAGCAGAGACCGGCTGCAGT   | 796  |
| Horse      | AAATTTGGTTTCAGAACAGAAGGATGAAAGAAAAAACTAAGCAGAGACCGGCTGCAGT   | 1009 |
| Cat        | AAATTTGGTTTCAGAACAGAAGGATGAAAGAAAAAACTAAGCAGAGACCGGCTGCAGT   | 1004 |
| Walrus     | AAATTTGGTTTCAGAACAGAAGGATGAAAGAAAAAACTAAGCAGAGACCGGCTGCAGT   | 1003 |
| Panda      | AAATTTGGTTTCAGAACAGAAGGATGAAAGAAAAAACTAAGCAGAGACCGGCTGCAGT   | 889  |
| Shrew      | AAATTTGGTTTCAGAACAGAAGGATGAAAGAAAAAACTAAGCAGAGACCGGCTGCAGT   | 1001 |
| Dog        | AAATTTGGTTTCAGAACAGAAGGATGAAAGAAAAAACTGAGCAGAGACCGGCTGCAGT   | 992  |
| Pig        | AAATTTGGTTTCAGAACAGAAGGATGAAAGAAAAAACTGAGCAGAGACCGGCTGCAGT   | 889  |
| Chimpanzee | AAATTTGGTTTCAGAACAGAAGGATGAAAGAAAAAACTGAGCAGAGACCGGCTGCAGT   | 1005 |
| Human      | AAATTTGGTTTCAGAACAGAAGGATGAAAGAAAAAACTGAGCAGAGACCGGCTGCAGT   | 1005 |
| Orangutan  | AAATTTGGTTTCAGAACAGAAGGATGAAAGAAAAAACTGAGCAGAGACCGGCTGCAGT   | 1007 |
| Baboon     | AAATTTGGTTTCAGAACAGAAGGATGAAAGAAAAAACTGAGCAGAGACCGGCTGCAGT   | 1003 |
| Marmoset   | AAATTTGGTTTCAGAACAGAAGGATGAAAGAAAAAACTGAGCAGAGACCGGCTGCAAT   | 1003 |
|            | *** ***** ** * ***** ** * *****                              |      |
| Buffalo    | ATTTCTCGGGAAATCCTTGTCTGTAACC-GCAGACTGGG---CCCTTTTG-AGG-----  | 1040 |
| Cow        | ATTTCTCGGGAAATCCTTGTCTGTAACC-GCAGACTGGG---CCCTTTTG-AGG-----  | 1040 |
| Whale      | ATTTCTCAGGAAATCCTTGTCTGTAACC-GCGGACCGGG---CCCTTTT-G-GGG----- | 1054 |
| Dolphin    | ATTTCTCAGGAAATCCTTGTCTGTAACC-GCGGACCGGG---CCCTTTT-G-GGG----- | 1054 |
| Sheep      | ATTTCTCGGGAAATCCTTGTCTGTAA-----                              | 822  |
| Horse      | ATTTCTCGGGAAATCCTTGTCTGTAACC-GCAGACCGGG---CCCTTTTG-GGG-----  | 1058 |
| Cat        | ATTTCTCGGGAAATCCTTGTCTGTAACC-GCAGACCGGG---CCCTTTTG-GGG-----  | 1053 |
| Walrus     | ATTTCTCGGGAAATCCTTGTCTGTAACC-GCAGACCGGG---CCCTTTAC-GGG-----  | 1052 |
| Panda      | ATTTCTCGGGAAATCCTTGTCTGTAA-----                              | 915  |
| Shrew      | ATTTCTCGGGAAATCCTTGTCTGTAACC-GCAGGCGGAGGCGCCCTTTGGCGGA-----  | 1054 |
| Dog        | ATTTCTCGGGAAATCCTTGTCTGTAACC-GCAGACCGGG---CCCTTCTGGGGGCGGGGG | 1048 |
| Pig        | ATTTCTCGGGAAATCCTTGTCTGTAA-----                              | 915  |
| Chimpanzee | ATTTCTCGGGAAATCCTTGTCTGTAACC-GCAGACCGGG---CCCTTTTG-----      | 1052 |
| Human      | ATTTCTCGGGAAATCCTTGTCTGTAACC-GCAGACCGGG---CCCTTTTG-----      | 1052 |
| Orangutan  | ATTTCTCGGGAAATCCTTGTCTGTAACC-GCAGACCGGG---CCCTTTTG-----      | 1054 |
| Baboon     | ATTTCTCGGGAAATCCTTGTCTGTAACC-GCAGACCGGG---CCCTTTTG-----      | 1050 |
| Marmoset   | ATTTCTCGGGAAATCCTTGTCTGTAACC-GCAGACCGGG---CCCTTTTG-----      | 1050 |
|            | **** * * * * *****                                           |      |

SUPPLEMENTARY FIG. S4. (Continued).



|            |                                                              |      |
|------------|--------------------------------------------------------------|------|
| Buffalo    | -----GGAGG-GGGGAAAGGG-----GGAAATTATTTTATTTT                  | 1072 |
| Cow        | -----GGAGG-GGGGAAAGGG-----GAAATTATTTTATTTT                   | 1072 |
| Whale      | -----GGAGG-GGGGAAAGGG-----GGAGATTATTTTATTTT                  | 1086 |
| Dolphin    | -----GGAGG-GGGGAAAGGG-----GGAGATTATTTTATTTT                  | 1086 |
| Sheep      | -----                                                        |      |
| Horse      | -----GAGGGAGGGGAAAGGG-----GGAAATTATTTTATTTT                  | 1091 |
| Cat        | -----GAGGGGGGAAAAGGG-----GGAAATTATTTTATTTT                   | 1086 |
| Walrus     | -----GAGGGGGA-AAAGGG-----GAAATTATTTTATTTT                    | 1084 |
| Panda      | -----                                                        |      |
| Shrew      | -----GGAGGAGGGGAGGGGGCCCGGGCGGGGGGAAGAAATTATTTTATTTT         | 1103 |
| Dog        | CCGGGTGGGGTGGGGGGGAAGAAAGGG-----GAGAAATTATTTTATTTT           | 1093 |
| Pig        | -----                                                        |      |
| Chimpanzee | -----GGGGCGGGGGGAGGG-----GAAATTATTTTATTTT                    | 1084 |
| Human      | -----GGGGCGGGGGGAGGG-----GAAATTATTTTATTTT                    | 1084 |
| Orangutan  | -----GGGGCGGGGGGAGGG-----GAAATTATTTTATTTT                    | 1086 |
| Baboon     | -----GGGGCGGGGGGAGGG-----GAAATTATTTTATTTT                    | 1082 |
| Marmoset   | -----GGGGCGGGGGGAGGG-----GAAAGTTATTTTATTTT                   | 1082 |
|            |                                                              |      |
| Buffalo    | ATTTTATTTTATTTTCTAACTCGCTACTTTCCGCGGGTGGAAAAGTGGACT-GTGG     | 1131 |
| Cow        | ATTTTATTTTATTTTCTAACTCGCTACTTTCCGCGGGTGGAAAAGTGGACT-GTGG     | 1131 |
| Whale      | ATTTTATTTTATTTTCTAACTCGCTTCTTTCCGCGGGTGGAAAAGTGGACT-GTGG     | 1145 |
| Dolphin    | ATTTTATTTTATTTTCTAACTCGCTTCTTTCCGCGGGTGGAAAAGTGGACT-GTGG     | 1145 |
| Sheep      | -----                                                        |      |
| Horse      | ATTTTATTTTATTTTCTAAATCGCTTCTTTCTGCGGGTGGAAAAGTGGACT-GTGG     | 1150 |
| Cat        | ATTTTATTTTATTTTCTAACTCGCTTCTTTCCGCGGGTGGAAAAGTGGACT-GTGG     | 1145 |
| Walrus     | ATTTT-ATTTTATTTTCTAACTCGCTTCTTTCCGCCGGTGGAAAAGTGGACT-GTGG    | 1142 |
| Panda      | -----                                                        |      |
| Shrew      | ATTTTATTTTATTTTACGTTGGACCTCGCTTCTTCCGCGGGTGGAAAC-CCGACTCGTGG | 1162 |
| Dog        | ATTTTATTTTATTTTCTAACTCGCTTCTTTCCGCGGGTGGAAAAGTGGACT-GTGG     | 1152 |
| Pig        | -----                                                        |      |
| Chimpanzee | ATTTTATTTTATTTTCTAACTCGTCTTCTTTCCGCCGGTGGAAAAGTGGACT-GTGG    | 1143 |
| Human      | ATTTTATTTTATTTTCTAACTCGTCTTCTTTCCGCCGGTGGAAAAGTGGACT-GTGG    | 1143 |
| Orangutan  | A----ATTTTATTTTCTAACTCGTCTTCTTTCCGCCGATGGAAAAGTGGACT-GTGG    | 1140 |
| Baboon     | ATTTTATTTTATTTTCTAACTCGTCTTCTTTCCGCGGGTGGAAAAGTGGACT-GTGG    | 1141 |
| Marmoset   | ATTTTATTTTATTTTCTAAGTCGTCTTCTTCCGCTGGTGGAAAAGTGGACT-G-GG     | 1140 |
|            |                                                              |      |
| Buffalo    | CCAGGGCTGGCCCCACTGCCGTTTCCCGCACGTCTTTCTGGACAACCTCCTTCACCT-T  | 1190 |
| Cow        | CCAGGGCTGGCCCCACTGCCGTTTCCCGCACGTCTTTCTGGACAACCTCCTTCACCT-T  | 1190 |
| Whale      | CCAGGGCTGGCCCCACTGCCGTTGCCCCGACTTCTTTCCGG--AACCTCCTTCACCT-T  | 1202 |
| Dolphin    | CCAGGGCTGGCCCCACTGCCGTTGCCCCGACTTCTTTCCGG--AACCTCCTTCACCT-T  | 1202 |
| Sheep      | -----                                                        |      |
| Horse      | CCAGGGCTGGCCCCACTGCCGTTGCCCCGACTTCTTTCCGG--AACCTCCTTCACCT-T  | 1207 |
| Cat        | CCAGGGCTGGCCCCACTGCCGTTGCCCCGACTTCTTTCTGG--AACCTCCTTCACCT-T  | 1202 |
| Walrus     | CCAGGGCTGGCCCCACTGCCGTTGCCCCCACATCTTTCTGG--AACCTCCTTCGCCT-T  | 1199 |
| Panda      | -----                                                        |      |
| Shrew      | CCAGGGCTGGCCCCCGGGC-----                                     | 1182 |
| Dog        | CCAGGGCTGGCCCCACTGCTG-----                                   | 1174 |
| Pig        | -----                                                        |      |
| Chimpanzee | CCAGGGCTGGCCCCACCGCTGTGGCCGGCACTCCATTCCGG--AACCTCCTGGACCC-T  | 1200 |
| Human      | CCAGGGCTGGCCCCACCGCTGTGGCCGGCACTCCATTCCGG--AACCTCCTGGACCC-T  | 1200 |
| Orangutan  | CCAGGGCTGGCCCCACCGCTGTGGCAGGCACCTCCATTCCAG--AACCTCCTGGACCCCT | 1198 |
| Baboon     | CCAGGGCTGGCCCCACCGCTGTGGCCGGCACTCCGTTCCGG--AACCTCCTGGACCC-T  | 1198 |
| Marmoset   | CCAGGGCTGGCCCCACCGCTGTGGCCGGCACTCCATTCCGG--AACCTCCTGGACCC-T  | 1197 |

SUPPLEMENTARY FIG. S4. (Continued).

|            |                                                               |      |
|------------|---------------------------------------------------------------|------|
| Buffalo    | -GGTCTGACT-----                                               | 1199 |
| Cow        | -GGTCTGACT-----                                               | 1199 |
| Whale      | -GGTCTGACTC--AGTGTGGGACAGGGACCGGGCCTGGAAAGGGGGTGAAGGAAAGTGT   | 1259 |
| Dolphin    | -GGTCTGACTC--AGTGTGGGACAGGGACCGGGCCTGGAAAGGGGGTGAAGGAGAGTGT   | 1259 |
| Sheep      | -----                                                         |      |
| Horse      | CGGGCTGACTC--TCGCTAGGGGACAGGACCGGGCCTG--AAAGGGGGTGAAGGGAAGTGT | 1263 |
| Cat        | CCGTCTGACTCTCGCTGTGGGACAGGGACCGAGCCTGGAAAGAGGGTGAAGGGAAGTGT   | 1262 |
| Walrus     | CCGTCTGACTC--GCTGTGGGACAGGGACCGGGCCTGGAAAGAGGG--GGAAGGGAAGTGT | 1256 |
| Panda      | -----                                                         |      |
| Shrew      | -----                                                         |      |
| Dog        | -----                                                         |      |
| Pig        | -----                                                         |      |
| Chimpanzee | CTATCTGACTCTCGCTGTGGGACAGGGACCGGGCCTGGAAAGGGGG--TGAAGGGAAGTGT | 1259 |
| Human      | CTATCTGACTCTCGCTGTGGGACAGGGACCGGGCCTGGAAAGGGGG--TGAAGGGAAGTGT | 1259 |
| Orangutan  | CTATCTGACTCTCGCTGTGGGACAGGGACCGGGCCTGGAAACGGGG--TGAAGGGAAGTGT | 1257 |
| Baboon     | CGATCTGACTCTCGCTGTGGGACCGGGACCGGGCCTGAAAAGGGGG--TGAAGGGAAGTGT | 1257 |
| Marmoset   | CTGCCTGACTCGCGCTGTGGGACAGGGACCGGGCCTGGAAAGGGGG--TGAAGGGAAGTGT | 1256 |

SUPPLEMENTARY FIG. S4. (Continued).
