# Supplementary material
Source: PubMed Central journal article supplement (PMC4484715)
Supplement: Supp_Table1.pdf [file Supp_Table1.pdf]

## Supplementary Data

SUPPLEMENTARY TABLE S1. DETAILS OF PRIMERS USED FOR ANALYSIS OF *Hoxc11* GENE  
IN WATER BUFFALO *BUBALUS BUBALIS*

| <i>S. No.</i>                                             | <i>Primer ID</i>        | <i>Primer sequence (5'-3')</i> | <i>Mers</i> | <i>T<sub>m</sub></i> | <i>Annealing temperature (°C)</i> | <i>Size of the amplicon (bp)</i> | <i>Nucleotide position of the primers in the sequence</i> |
|-----------------------------------------------------------|-------------------------|--------------------------------|-------------|----------------------|-----------------------------------|----------------------------------|-----------------------------------------------------------|
| Full-length amplification of <i>Hoxc11</i>                |                         |                                |             |                      |                                   |                                  |                                                           |
| 1                                                         | SA2407                  | ACCAATCGCCTGAACGTCCC           | 20          | 70.5                 | 62                                | 1380                             | 1–20                                                      |
|                                                           | SA2408                  | TCCAATGCCTCTCTTTCCA            | 20          | 64.9                 |                                   |                                  | 1361–1380                                                 |
| 2                                                         | SA2409                  | ATCGCGGGCAATATTAACTTT          | 21          | 63.2                 | 60                                | 1400                             | 1200–1220                                                 |
|                                                           | SA2410                  | TGTCCCTGTCCCACATGGAG           | 20          | 68.6                 |                                   |                                  | 2580–2599                                                 |
| 3                                                         | SA2411                  | AACTGGACTGTGGCCAGG             | 18          | 64.0                 | 56                                | 930                              | 2501–2518                                                 |
|                                                           | SA2412                  | AATGAAGTATCTTTATTTGCC          | 21          | 54.2                 |                                   |                                  | 3410–3430                                                 |
| Relative expression of <i>Hoxc11</i>                      |                         |                                |             |                      |                                   |                                  |                                                           |
| 4                                                         | SALR6F                  | AGCTGCGCCTCCAACCT              | 17          | 66.3                 | 60                                | 58                               | 79–95                                                     |
|                                                           | SALR6R                  | TGGAGAACTCGGGCACGTA            | 19          | 66.9                 | 60                                |                                  | 118–136                                                   |
| Relative expression of <i>Hoxc11</i> interacting partners |                         |                                |             |                      |                                   |                                  |                                                           |
| 5                                                         | <i>POU3F3</i> (SALR128) | CCTGTACGGCAACGTGTTCTC          | 21          | 66.7                 | 60                                | 83                               | 2358–2378                                                 |
|                                                           | <i>POU3F3</i> (SALR129) | TGAGCTTGCACATGTTCTTGAA         | 22          | 65.7                 | 60                                |                                  | 2419–2440                                                 |
| 6                                                         | <i>TBX4</i> (SALR130)   | GCAGACCATCGAGAACATCAAG         | 22          | 65.9                 | 60                                | 70                               | 207–228                                                   |
|                                                           | <i>TBX4</i> (SALR131)   | GCCCCCCTCGTGGAA                | 15          | 67.7                 | 60                                |                                  | 262–276                                                   |
| 7                                                         | <i>NUP98</i> (SALR132)  | GCCCCGATCGACTTGCT              | 17          | 66.6                 | 60                                | 70                               | 2462–2478                                                 |
|                                                           | <i>NUP98</i> (SALR133)  | TGAGCTCCCTGTTTCCTTGAA          | 21          | 66.0                 | 60                                |                                  | 2511–2531                                                 |
| 8                                                         | <i>Hoxa9</i> (SALR133)  | ACTTTGTCCCTGACTGACTATGCTT      | 25          | 65.0                 | 60                                | 65                               | 451–475                                                   |
|                                                           | <i>Hoxa9</i> (SALR134)  | TCGCTGGGCTGTTTTTCTCT           | 20          | 66.1                 | 60                                |                                  | 496–515                                                   |
| 9                                                         | <i>MEIS1</i> (SALR134)  | GCCAATGGGAGGTTTTGTTATG         | 22          | 66.0                 | 60                                | 60                               | 1059–1080                                                 |
|                                                           | <i>MEIS1</i> (SALR135)  | GGTCCTGGTGCCCTGATTC            | 19          | 66.9                 | 60                                |                                  | 1100–1118                                                 |
| 10                                                        | <i>DDX10</i> (SALR136)  | GATTATGCCCTGTCTCTTGGTCTT       | 24          | 65.3                 | 60                                | 73                               | 1492–1515                                                 |
|                                                           | <i>DDX10</i> (SALR137)  | TGGGTTGCTTTTGCATTCTCT          | 21          | 65.7                 | 60                                |                                  | 1544–1564                                                 |
